# Supplementary material for: Comparative changes of health-promoting phytochemicals and sugar metabolism of two hardy kiwifruit (Actinidia arguta) cultivars during fruit development and maturity
Source: Front Plant Sci. 2022 Dec 15;13:1087452. doi: 10.3389/fpls.2022.1087452 (PMC9798231; doi:10.3389/fpls.2022.1087452)
Supplement: Supplementary file 1 [file Table_1.xlsx]

## Sheet: Sheet1
Table S1. All primers used for qPCR reactions in this study.
Genes	Primer Sequences (5-3′)
Neutral invertase (NI)	F:CTCCCAAGACTGGAGACGAAG
	R:GCCACTCTTCCTATTGCACTC
Soluble acid invertase (SAI)	F:GCTGGACACGTCAGTGAATG
	R:CCATAATCCACCCGCAACC
Sucrose synthase (SS)	F:ACTCTCCAAAGAGGTCCAACAG
	R:CTCAATTCTTCAACAACAAGGGC
Sucrose phosphate synthase (SPS)	F:CACATGAAGGTGATATGGACGG
	R:GACATTCCCCAAATGCTTCAACC
Hexokinase (HK)	F:AGAAGGGCACCTATTATGCACTC
	R:GAACTCGTTTAGTGAGGAGGC
Fructokinase (FK)	F:AGCAAGATTAGGAGGCTCTTCG
	R:AGCCCTGAGTGTAACAAATGC
AaActin	F:GCTTACAGAGGCACCACTCAACC
	R:CCGGAATCCAGCACAATACCAG
